# Supplementary material for: Diagnostic performance of an algorithm for automated collateral scoring on computed tomography angiography
Source: Eur Radiol. 2022 Mar 4;32(8):5711–8. doi: 10.1007/s00330-022-08627-4 (PMC9279191; doi:10.1007/s00330-022-08627-4)
Supplement: Supplementary file 1 — (DOCX 36 kb) [file 330_2022_8627_MOESM1_ESM.docx]

Diagnostic performance of an algorithm for automated collateral scoring on computed tomography angiography

## supplemental materials

**Table 1.** Baseline characteristics of the 1024 analysed patients

| **Demographics** | |
| --- | --- |
| Age - year |  |
| Median | 71.2 |
| Interquartile range | 50.8–76.9 |
| Male sex – no. (%) | 543 (53.0) |
| **Medical history** | |
| Prestroke modified Rankin scale score – no. (%)a |  |
| 0 | 666 (65.0) |
| 1 | 139 (13.6) |
| 2 | 83 (8.1) |
| >2 | 118 (11.5) |
| Systolic blood pressure – mm Hgb | 149.2±24.9 |
| Treatment with IV alteplase – no. (%) | 777 (75.9) |
| **Imaging** | |
| Right hemisphere, n (%) | 480 (53.1) |
| Occluded segment – no./total no. (%) |  |
| ICA | 255 (24.9) |
| M1 | 643 (62.8) |
| M2 | 126 (12.3) |
| ASPECTS on NCCT, median (IQR)c | 9 (7–10) |
| Visual collaterals, n (%) |  |
| Grade 0 | 71 (6.9) |
| Grade 1 | 356 (34.8) |
| Grade 2 | 391 (38.2) |
| Grade 3 | 206 (20.1) |
| Quantitative collaterals, n (%) |  |
| 0 - < 25% | 15 (1.5) |
| 25 - < 50% | 477 (46.6) |
| 50 - < 75% | 357 (34.9) |
| 75 – 100% | 175 (17.1) |

aScores on the modified Rankin scale (mRS) of functional disability range from 0 (no symptoms) to 6 (death). A score of 2 or less indicates functional independence. Data on mRS at baseline were missing for 18 patients.

bData on systolic blood pressure at baseline were missing for 28 patients.

cThe Alberta Stroke Program Early Computed Tomography Score (ASPECTS) is a measure of the extent of stroke. Scores ranges from 0 to 10, with higher scores indicating fewer early ischemic changes. Scores were not available for 24 patients.

**Occlusion side detection errors**

5% of all anterior LVO patients (n=1360) were excluded because no occlusion side was detected (45/69) or an incorrect side was appointed as the affected hemisphere (24/69). Details on these cases can be found in table 1 (no occlusion side found) and table 2 (incorrect side appointed as affected hemisphere).

**Table 2.** Cases without detection of occlusion side by the algorithm.

| Case | Occlusion side | Most proximal occlusion location | Collateral score | ASPECTS | phase | slicethickness |
| --- | --- | --- | --- | --- | --- | --- |
|  | Core Lab | Core Lab | Core Lab | Core Lab | Algorithm | CTA scan |
| 1 | Right | M2 | 0 | 10 | Peak Venous | 1,3 |
| 2 | Right | M2 | 0 | 10 | Equilibrium | 2,0 |
| 3 | Left | M2 | 0 | 10 | Equilibrium | 2,0 |
| 4 | Right | ICA-T | 1 | 7 | Peak Arterial | 1,0 |
| 5 | Left | ICA-T | 1 | 6 | Early Arterial | 1,0 |
| 6 | Right | M1 | 1 | 10 | Late Venous | 1,0 |
| 7 | Right | M1 | 1 | 10 | Equilibrium | 0,6 |
| 8 | Right | M2 | 1 | 10 | Early Arterial | 2,0 |
| 9 | Right | M2 | 1 | 8 | Early Arterial | 3,0 |
| 10 | Left | Extracranial ICA (with tandem lesion) | 2 | 10 | Peak Venous | 2,0 |
| 11 | Left | ICA-T | 2 | 6 | Early Arterial | 2,0 |
| 12 | Left | ICA-T | 2 | 9 | Equilibrium | 1,0 |
| 13 | Left | ICA-T | 2 | 5 | Early Arterial | 3,0 |
| 14 | Right | Intracranial ICA | 2 | 9 | Peak Venous | 2,0 |
| 15 | Right | M1 | 2 | 5 | Peak Venous | 3,0 |
| 16 | Left | M1 | 2 | 9 | Peak Arterial | 0,9 |
| 17 | Right | M2 | 2 | 10 | Peak Arterial | 0,8 |
| 18 | Right | M2 | 2 | 5 | Peak Arterial | 0,8 |
| 19 | Right | M2 | 2 | 10 | Equilibrium | 1,3 |
| 20 | Right | M2 | 2 | 10 | Equilibrium | 2,0 |
| 21 | Right | M2 | 2 | 10 | Peak Arterial | 0,5 |
| 22 | Right | M2 | 2 | 7 | Peak Venous | 0,9 |
| 23 | Left | M2 | 2 | 5 | Peak Arterial | 0,8 |
| 24 | Left | M2 | 2 | 10 | Peak Arterial | 0,8 |
| 25 | Left | M2 | 2 | 10 | Equilibrium | 0,8 |
| 26 | Left | M2 | 2 | 10 | Early Arterial | 0,5 |
| 27 | Left | M2 | 2 | 2 | Equilibrium | 0,9 |
| 28 | Left | Extracranial ICA (with tandem lesion) | 3 | 10 | Late Venous | 2,0 |
| 29 | Left | Extracranial ICA (with tandem lesion) | 3 | - | Peak Arterial | 0,8 |
| 30 | Right | ICA-T | 3 | 9 | Late Venous | 2,0 |
| 31 | Left | Intracranial ICA | 3 | 10 | Peak Venous | 1,3 |
| 32 | Left | M1 | 3 | 9 | Peak Arterial | 1,0 |
| 33 | Right | M1 | 3 | 8 | Peak Arterial | 0,8 |
| 34 | Right | M1 | 3 | 10 | Peak Venous | 1,0 |
| 35 | Right | M1 | 3 | 10 | Equilibrium | 2,0 |
| 36 | Right | M1 | 3 | 10 | Peak Venous | 2,0 |
| 37 | Right | M1 | 3 | 9 | Peak Arterial | 0,5 |
| 38 | Right | M1 | 3 | 10 | Peak Arterial | 0,9 |
| 39 | Right | M2 | 3 | 10 | Peak Arterial | 1,0 |
| 40 | Right | M2 | 3 | 9 | Early Arterial | 0,5 |
| 41 | Left | M2 | 3 | 10 | Peak Venous | 1,3 |
| 42 | Left | M2 | 3 | 10 | Early Arterial | 2,0 |
| 43 | Left | M2 | 3 | 9 | Equilibrium | 2,0 |
| 44 | Left | M2 | 3 | 10 | Peak Arterial | 0,8 |
| 45 | Left | M2 | 3 | 10 | Peak Venous | 3,0 |

**Table 3.** Cases with an incorrect side appointed as affected hemisphere.

| Case | Occlusion side | | Most proximal occlusion location* | | Collateral score | | Quantitative collateral score | Detected acquisition phase | ASPECTS** | Slice thickness (mm) |
| --- | --- | --- | --- | --- | --- | --- | --- | --- | --- | --- |
|  | Core Lab | Algorithm | Core Lab | Algorithm | Core Lab | Algorithm | Algorithm | Algorithm | Core Lab | CTA scan |
| 1 | Left | Right | ICA-T | Intracranial ICA | 0 | 3 | 100 | Late Venous | 10 | 2,0 |
| 2 | Left | Right | M1 | Not on vessel | 1 | 2 | 62 | Early Arterial | 10 | 2,0 |
| 3 | Right | Left | ICA-T | M1 | 1 | 2 | 71 | Peak Venous | 8 | 1,0 |
| 4 | Left | Right | ICA-T | M1 | 1 | 3 | 100 | Peak Arterial | 9 | 0,9 |
| 5 | Left | Right | M1 | Not on vessel | 1 | 3 | 100 | Early Arterial | 10 | 0,9 |
| 6 | Right | Left | M1 | M1 | 1 | 3 | 100 | Early Arterial | 7 | 0,9 |
| 7 | Right | Left | M1 | M2 | 1 | 3 | 100 | Equilibrium | 10 | 3,0 |
| 8 | Right | Left | M2 | Intracranial ICA | 1 | 3 | 100 | Early Arterial | 8 | 3,0 |
| 9 | Left | Right | ICA-T | Not on vessel | 2 | 1 | 47 | Peak Venous | 8 | 1,0 |
| 10 | Left | Right | M2 | ICA-T | 2 | 2 | 58 | Equilibrium | 9 | 3,0 |
| 11 | Right | Left | M1 | M1 | 2 | 2 | 61 | Equilibrium | 10 | 3,0 |
| 12 | Left | Right | ICA-T | Not on vessel | 2 | 2 | 67 | Early Arterial | 8 | 2,0 |
| 13 | Left | Right | Intracranial ICA | Intracranial ICA | 2 | 3 | 100 | Peak Arterial | 8 | 0,6 |
| 14 | Right | Left | Intracranial ICA | M1 | 2 | 3 | 100 | Early Arterial | 8 | 1,0 |
| 15 | Left | Right | ICA-T | Not on vessel | 2 | 3 | 100 | Peak Arterial | 7 | 3,0 |
| 16 | Right | Left | ICA-T | M1 | 2 | 3 | 100 | Early Arterial | 9 | 2,0 |
| 17 | Left | Right | ICA-T | Intracranial ICA | 3 | 1 | 5 | Late Venous | 10 | 1,3 |
| 18 | Left | Right | M2 | ICA-T | 3 | 1 | 24 | Late Venous | 10 | 1,0 |
| 19 | Right | Left | M1 | M1 | 3 | 1 | 35 | Peak Venous | 10 | 1,0 |
| 20 | Right | Left | ICA-T | Not on vessel | 3 | 2 | 70 | Peak Venous | 5 | 0,8 |
| 21 | Left | Right | M2 | Not on vessel | 3 | 2 | 70 | Late Venous | 9 | 1,0 |
| 22 | Right | Left | M1 | Not on vessel | 3 | 3 | 100 | Peak Arterial | 10 | 1,0 |
| 23 | Right | Left | M1 | Not on vessel | 3 | 3 | 100 | Peak Venous | - | 0,6 |
| 24 | Right | Left | M2 | Not on vessel | 3 | 3 | 100 | Late Venous | 7 | 2,0 |

*For the algorithm: a visual box was placed around the detected occlusion by the algorithm. The most proximal occlusion location within the placed box was noted by a reader (S.L.).

**The Alberta stroke programme early CT score.
